# Supplementary material for: The physics of pandemics with application to COVID19
Source: Research Square preprint supplement (doi:10.21203/rs.3.rs-208944/v1), 2021-02-06
Supplement: Supplementary file 1 [file 3ee0184d64cdf2111034392c.pdf]

# Supplementary Information for 'The physics of pandemics with application to COVID19'

Thanushika Gunatilake and Stephen A. Miller

Table 1: Supplementary Table 1. Sources used in this study.

| Country     | Website                                                                     | Link                                                                                                              |
|-------------|-----------------------------------------------------------------------------|-------------------------------------------------------------------------------------------------------------------|
| Austria     | Statistik Austria - Die Informationsmanger                                  | <a href="https://www.statistik.at/atlas">https://www.statistik.at/atlas</a>                                       |
| Belgium     | Statbel, the Belgian statistical office                                     | <a href="https://statbel.fgov.be/en">https://statbel.fgov.be/en</a>                                               |
| Brazil      | Instituto Brasileiro de Geografia e Estatística                             | <a href="https://cidades.ibge.gov.br/brasil">https://cidades.ibge.gov.br/brasil</a>                               |
| France      | Insee - National Institute of Statistics and Economic Studies               | <a href="https://www.insee.fr/en/accueil">https://www.insee.fr/en/accueil</a>                                     |
| Germany     | Statistische Ämter des Bundes und der Länder<br>Gemeinsames Statistikportal | <a href="https://www.statistikportal.de/de">https://www.statistikportal.de/de</a>                                 |
| Italy       | Istat Statistics                                                            | <a href="https://www.istat.it/en/">https://www.istat.it/en/</a>                                                   |
| Melbourne   | Research and statistics - City of Melbourne                                 | <a href="https://www.melbourne.vic.gov.au">https://www.melbourne.vic.gov.au</a>                                   |
| New Zealand | Stats New Zealand                                                           | <a href="https://www.stats.govt.nz">https://www.stats.govt.nz</a>                                                 |
| Spain       | INE- National Statistics Institute. Spain                                   | <a href="https://www.ine.es/en/">https://www.ine.es/en/</a>                                                       |
| Sweden      | Statistics Sweden                                                           | <a href="https://www.scb.se/en/">https://www.scb.se/en/</a>                                                       |
| Switzerland | Bundesamt für Statistik-<br>Statistischer Atlas der Schweiz                 | <a href="https://www.atlas.bfs.admin.ch/maps">https://www.atlas.bfs.admin.ch/maps</a>                             |
| UK          | Research and statistics - GOV.UK                                            | <a href="https://www.gov.uk/search/research-and-statistics">https://www.gov.uk/search/research-and-statistics</a> |
| USA         | United States Census Bureau                                                 | <a href="https://www.census.gov">https://www.census.gov</a>                                                       |

Supplementary Figure 1

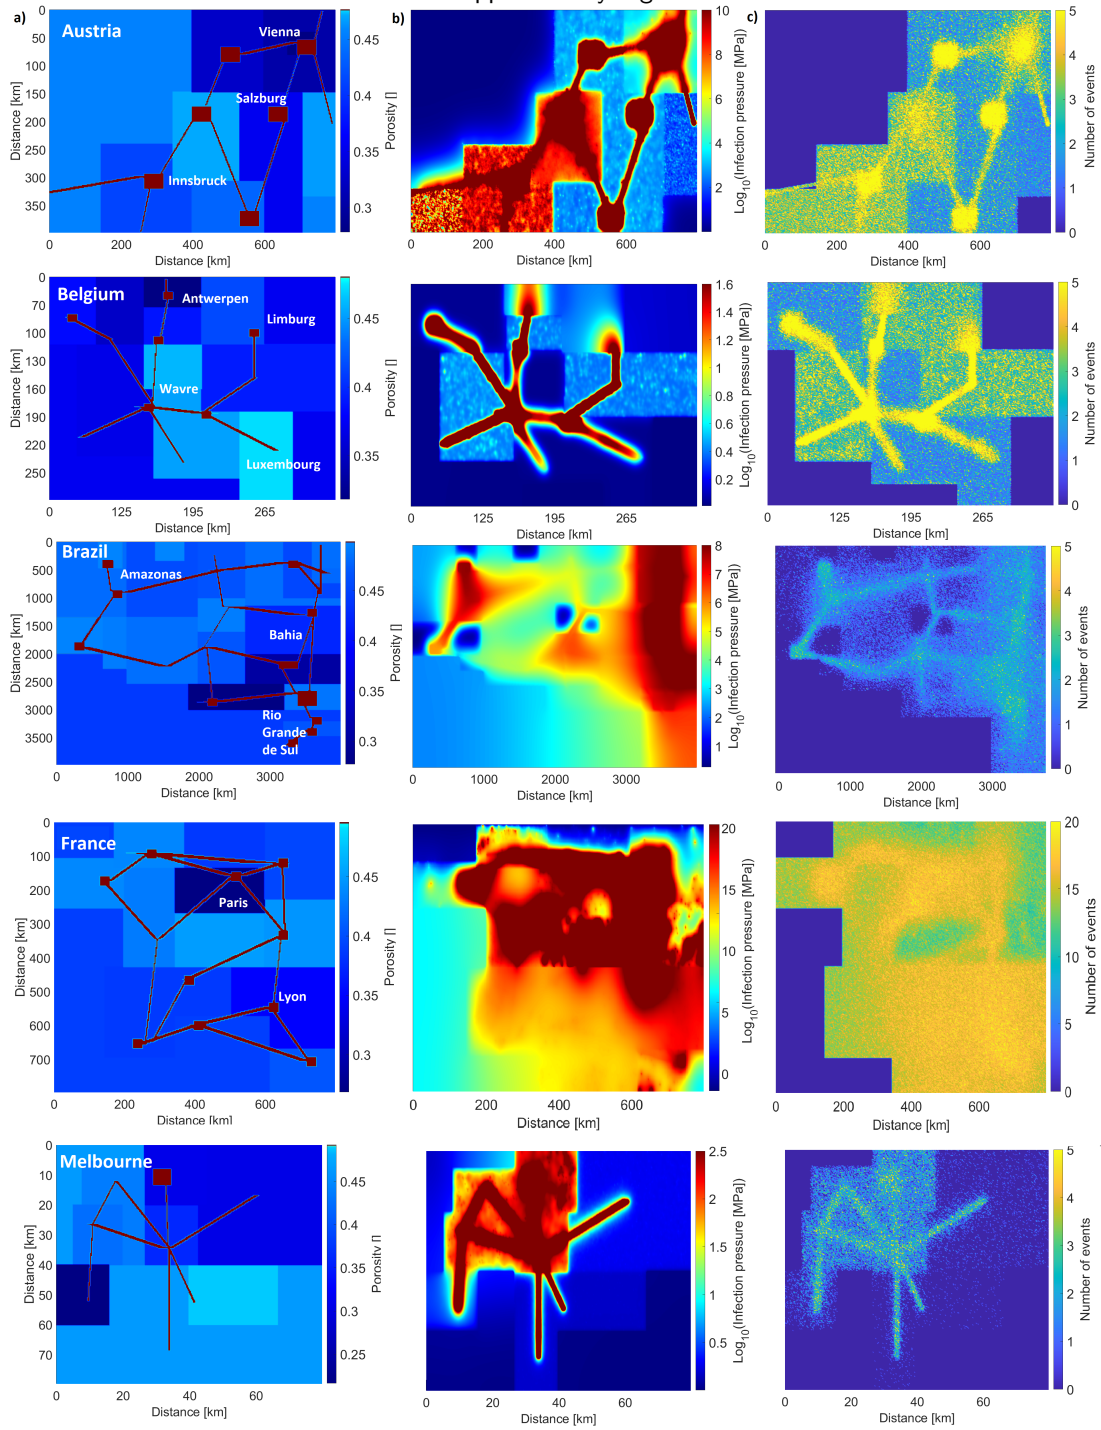

Figure 1: a) Model setup for Austria, Belgium, Brazil, France and Melbourne showing the source locations (red) signifying airports and intercity rail lines, and the various shades of blue scale with population density and delineate federal states. b) Calculated infection pressure at the end of the simulation. Note change in scale bar for each country. c) The number of repeated infections calculated in the model highlights the most affected regions and shows how elevated infection pressures (Figure 1 b) continue to generate model infections.

Supplementary Figure 2

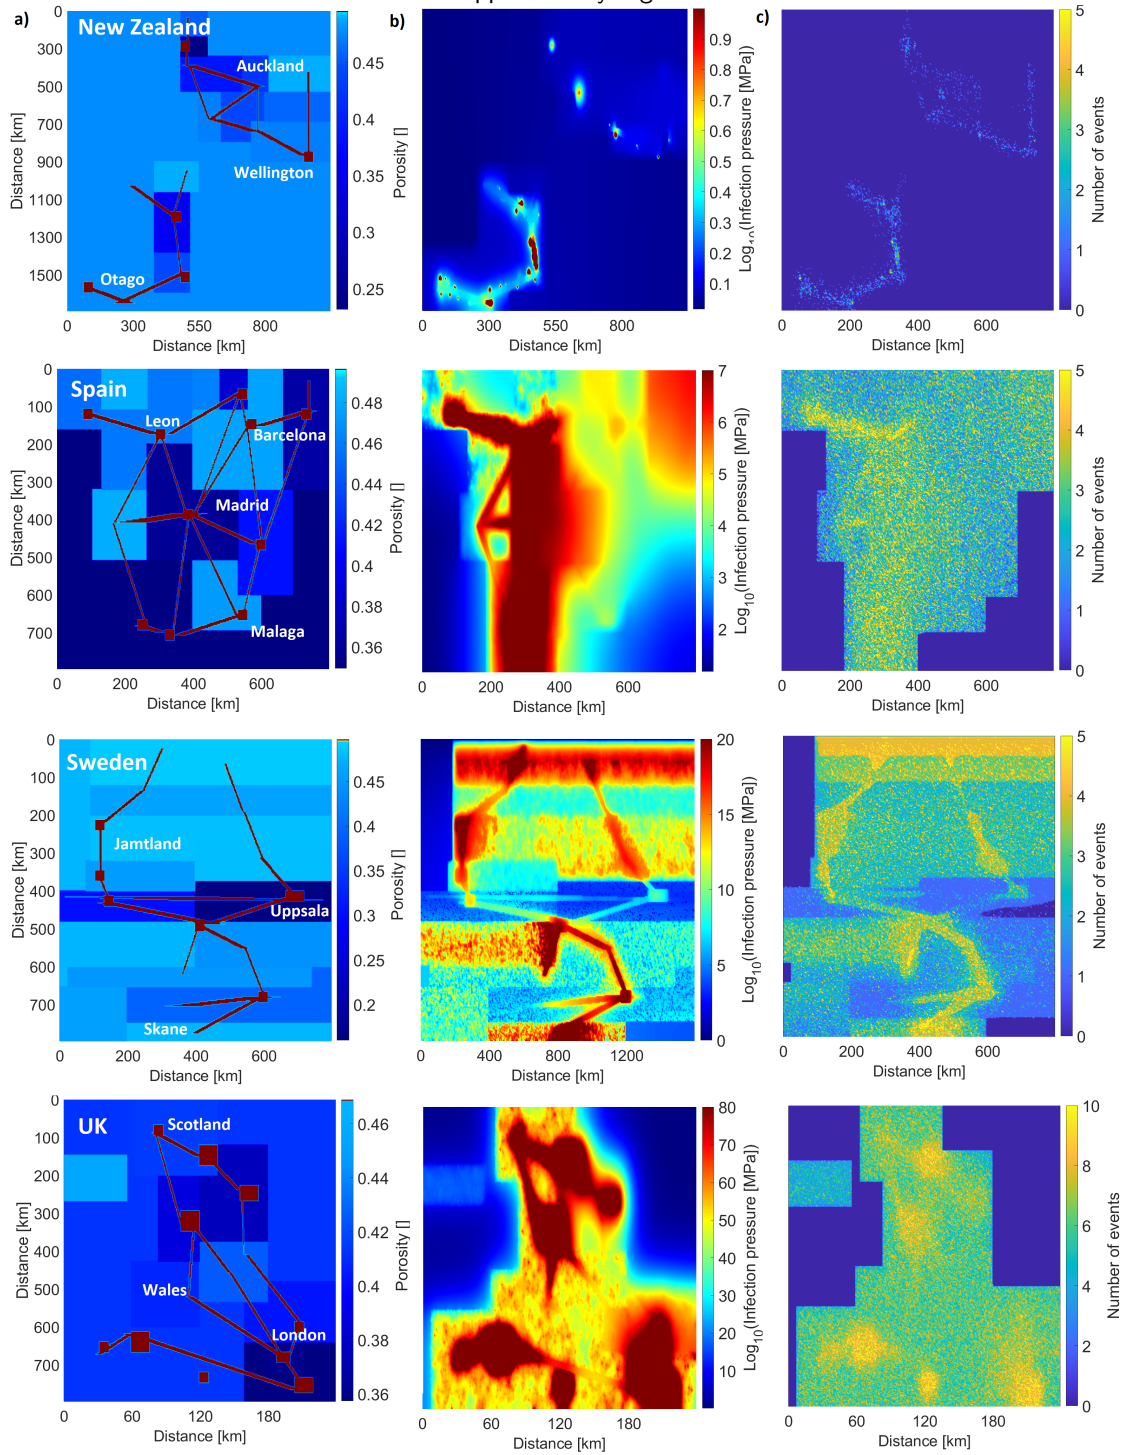

Figure 2: a) Model setup for New Zealand, Spain, Sweden and the UK showing the source locations (red) signifying airports and intercity rail lines, and the various shades of blue scale with population density and delineate federal states. b) Calculated infection pressure at the end of the simulation. Note change in scale bar for each country. c) The number of repeated infections calculated in the model highlights the most affected regions and shows how elevated infection pressures (Figure 2 b) continue to generate model infections.



Supplementary Figure 3

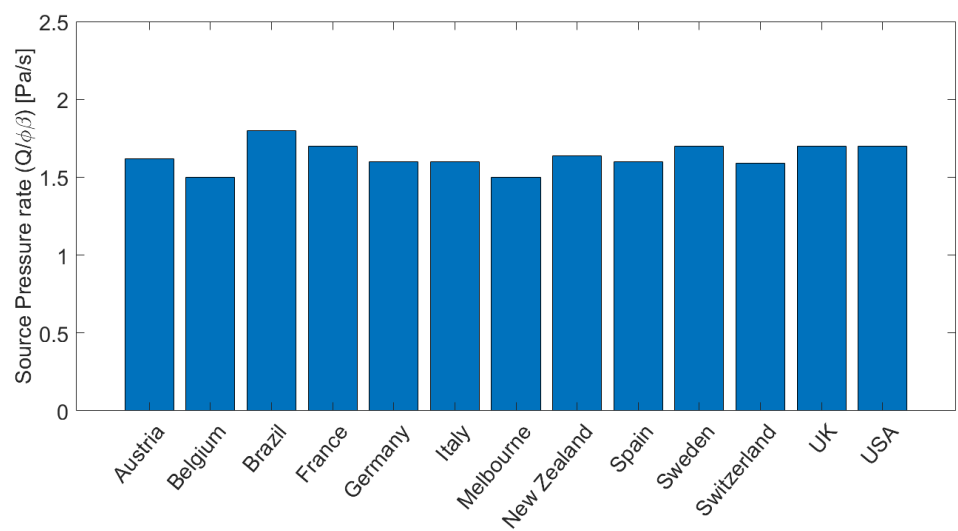

Figure 3: Average initial source pressure rate for each studied case.
